# Supplementary material for: Pressure-induced phase transition of La2Zr2O7 and La0.5Gd1.5Zr2O7 pyrochlore
Source: Royal Society of Chemistry journal article supplement (doi:10.1039/c9ra03438b), 2019-01-01
Supplement: c9ra03438b1.pdf [file c9ra03438b1.pdf]

Supplementary Materials

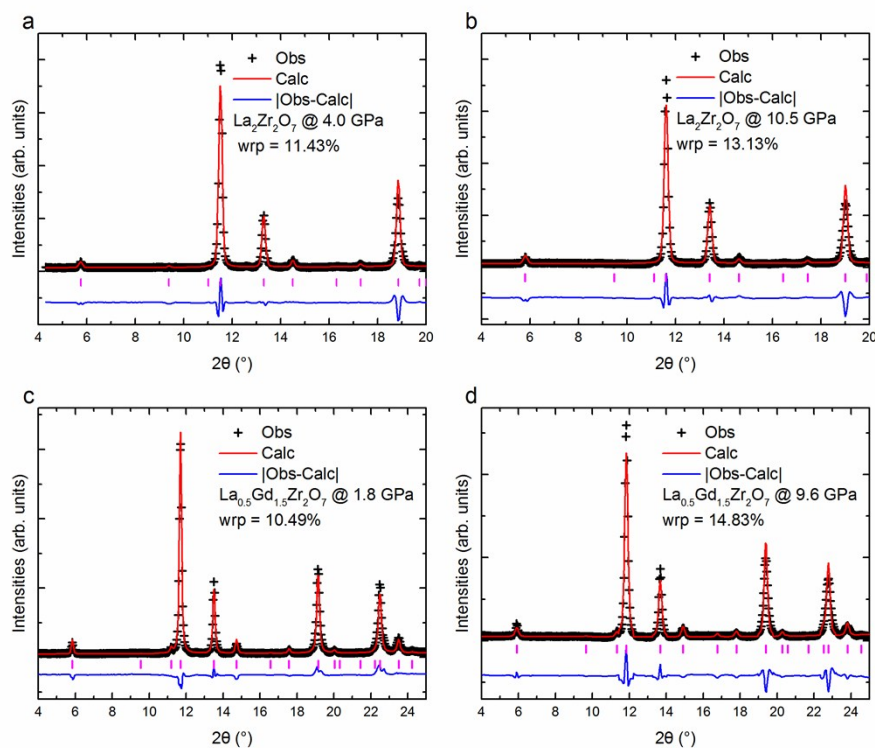

Fig. S1. Le Bail refinements results of a)  $\text{La}_2\text{Zr}_2\text{O}_7$  at 4.0 GPa. b)  $\text{La}_2\text{Zr}_2\text{O}_7$  at 10.5 GPa. c)  $\text{La}_{0.5}\text{Gd}_{1.5}\text{Zr}_2\text{O}_7$  at 1.8 GPa and d)  $\text{La}_{0.5}\text{Gd}_{1.5}\text{Zr}_2\text{O}_7$  at 9.6 GPa. Black cross are the data observed from XRD pattern and red lines are the calculated XRD pattern curves. Blue lines are the differences between the observation and the calculations. Magenta bars mark the  $2\theta$  of the calculated reflections.

Table s1. The a-axial lengths and unit-cell volumes of  $\text{La}_2\text{Zr}_2\text{O}_7$  and  $\text{La}_{0.5}\text{Gd}_{1.5}\text{Zr}_2\text{O}_7$  under pressures.

| $\text{La}_2\text{Zr}_2\text{O}_7$ |            |                       | $\text{La}_{0.5}\text{Gd}_{1.5}\text{Zr}_2\text{O}_7$ |            |                       |
|------------------------------------|------------|-----------------------|-------------------------------------------------------|------------|-----------------------|
| $P$ (GPa)                          | $a$ (Å)    | $V$ (Å <sup>3</sup> ) | $P$ (GPa)                                             | $a$ (Å)    | $V$ (Å <sup>3</sup> ) |
| 0.0001                             | 10.788(1)  | 1255.4(1)             | 0.1                                                   | 10.5786(3) | 1183.8(1)             |
| 0.6                                | 10.7747(5) | 1250.9(2)             | 1.8                                                   | 10.5428(5) | 1171.8(2)             |
| 2.3                                | 10.7375(6) | 1238.0(2)             | 3.6                                                   | 10.4892(6) | 1154.1(2)             |
| 3.9                                | 10.7094(6) | 1228.3(2)             | 5.0                                                   | 10.4661(5) | 1146.5(2)             |
| 5.6                                | 10.6770(6) | 1217.2(2)             | 7.4                                                   | 10.4332(7) | 1135.7(2)             |
| 7.1                                | 10.6550(6) | 1209.7(2)             | 9.6                                                   | 10.4111(7) | 1128.5(2)             |
| 8.7                                | 10.6331(6) | 1202.2(2)             | 13.2                                                  | 10.3768(7) | 1117.4(2)             |
| 10.5                               | 10.6131(7) | 1195.4(2)             | 14.7                                                  | 10.3668(7) | 1114.1(2)             |
| 12.4                               | 10.5893(6) | 1187.4(2)             | 16.1                                                  | 10.3585(8) | 1111.4(2)             |
| 14.0                               | 10.5724(7) | 1181.7(2)             | 17.9                                                  | 10.3432(7) | 1106.5(2)             |
| 15.5                               | 10.5482(8) | 1173.6(3)             | 20.1                                                  | 10.3223(8) | 1099.8(3)             |
| 17.1                               | 10.5327(8) | 1168.5(3)             | 21.7                                                  | 10.3081(9) | 1095.3(3)             |
| 19.0                               | 10.5072(8) | 1160.0(3)             |                                                       |            |                       |
| 20.8                               | 10.4865(7) | 1153.2(2)             |                                                       |            |                       |
| 22.8                               | 10.4580(9) | 1143.8(3)             |                                                       |            |                       |
